# Supplementary material for: Sources and fate of high levels of ammonium in surface water and shallow groundwater of the Jianghan Plain, Central China
Source: Royal Society of Chemistry journal article supplement (doi:10.1039/c6em00531d), 2017-01-01
Supplement: c6em00531d1.pdf [file c6em00531d1.pdf]

Table S1. Chemical compositions for all water samples. GW-H, UGW, LGW, TSR and HR represent groundwater in hilly area, upper groundwater of aquitard in low plain, lower groundwater of aquifer in low plain, Tongshun River and Han River, respectively.

| Sample number | Sample type | Well depth (m) | pH   | EC ( $\mu\text{s}/\text{cm}$ ) | Eh (mv) | Concentrations (mg/L) |                  |                    |                |                 |                  |                  |                 |                               |                               |                    |      |       | Concentrations ( $\mu\text{g}/\text{L}$ ) |      | Isotopes (‰)    |                    |                       |
|---------------|-------------|----------------|------|--------------------------------|---------|-----------------------|------------------|--------------------|----------------|-----------------|------------------|------------------|-----------------|-------------------------------|-------------------------------|--------------------|------|-------|-------------------------------------------|------|-----------------|--------------------|-----------------------|
|               |             |                |      |                                |         | NH <sub>4</sub> -N    | Fe <sup>2+</sup> | NO <sub>2</sub> -N | K <sup>+</sup> | Na <sup>+</sup> | Ca <sup>2+</sup> | Mg <sup>2+</sup> | Cl <sup>-</sup> | SO <sub>4</sub> <sup>2-</sup> | HCO <sub>3</sub> <sup>-</sup> | NO <sub>3</sub> -N | Mn   | DOC   | TN                                        | As   | S <sup>2-</sup> | $\delta^2\text{H}$ | $\delta^{18}\text{O}$ |
| 15G02         | GW-H        | 30             | 6.73 | 540                            | 57.5    | 0.02                  | 0.01             | 0.005              | 0.81           | 27.19           | 82.80            | 15.08            | 1.58            | 3.83                          | 378.02                        | 0.33               | 0.00 | 0.91  | 1.72                                      | 0.0  | 0               | -53.4              | -7.6                  |
| 15G03         | GW-H        | 45             | 6.50 | 333                            | 66.6    | 0.03                  | 0.02             | 0.004              | 0.70           | 18.87           | 66.53            | 6.404            | 9.03            | 16.53                         | 228.09                        | 0.70               | 0.00 | 15.56 | 3.03                                      | 0.6  | 6               | -36.9              | -5.3                  |
| 15G23         | GW-H        | 13             | 6.79 | 916                            | 169.9   | 0.02                  | 0.07             | 0.000              | n.d.           | n.d.            | n.d.             | n.d.             | 49.37           | 0.00                          | 189.01                        | 0.00               | 0.01 | 3.69  | 44.19                                     | 2.2  | 25              | -35.4              | -5.8                  |
| 15G24         | GW-H        | 16             | 6.83 | 783                            | 104.7   | 0.17                  | 0.00             | 0.023              | 0.79           | 13.71           | 126.90           | 25.88            | 6.10            | 0.00                          | 557.42                        | 0.00               | 2.78 | 0.99  | 0.79                                      | 0.0  | 3               | -50.4              | -7.7                  |
| 15G06         | UGW         | 12             | 6.45 | 702                            | 40.9    | 0.10                  | 0.10             | 0.181              | 1.51           | 6.93            | 113.30           | 24.59            | 24.66           | 55.71                         | 343.42                        | 9.44               | 3.41 | 1.65  | 26.74                                     | 0.0  | 2               | -43.7              | -6.9                  |
| 15G07         | UGW         | 8              | 6.41 | 1260                           | 49.7    | 0.06                  | 0.10             | 0.130              | 41.66          | 50.47           | 179.80           | 25.98            | 60.43           | 78.22                         | 629.18                        | 20.55              | 1.37 | 1.79  | 50.88                                     | 0.0  | 3               | -46.2              | -7.2                  |
| 15G20         | UGW         | 10             | 6.63 | 1020                           | -132.3  | 11.60                 | 10.90            | 0.008              | 3.36           | 16.55           | 137.50           | 19.03            | 30.57           | 0.72                          | 586.25                        | 0.17               | 0.74 | 6.08  | 12.34                                     | 65.9 | 37              | -38.1              | -6.2                  |
| 15G22         | UGW         | 10             | 6.62 | 1315                           | -101.8  | 8.70                  | 13.35            | 0.012              | 3.34           | 16.93           | 187.20           | 27.44            | 33.68           | 0.00                          | 815.30                        | 0.00               | 0.96 | 5.83  | 12.74                                     | 20.5 | 26              | -41.8              | -6.6                  |
| SH01C         | UGW         | 4              | 6.96 | 905                            | -106.7  | 2.33                  | 6.00             | 0.000              | 4.84           | 25.09           | 114.30           | 20.14            | 28.23           | 0.85                          | 581.44                        | 0.00               | 2.96 | 10.22 | 1.73                                      | 20.6 | 53              | -24.1              | -4.2                  |
| SH02C         | UGW         | 4              | 6.84 | 1197                           | -98.4   | 1.75                  | 6.25             | 0.000              | 3.58           | 18.51           | 164.30           | 26.40            | 72.47           | 0.00                          | 661.53                        | 0.00               | 1.34 | 12.09 | 2.96                                      | 6.0  | 1               | -29.1              | -3.7                  |
| SH03C         | UGW         | 4              | 7.01 | 969                            | -96.8   | 1.23                  | 2.80             | 0.000              | 6.37           | 40.14           | 131.40           | 22.12            | 85.63           | 55.37                         | 514.17                        | 0.09               | 3.64 | 4.65  | 2.03                                      | 4.0  | 43              | -27.9              | -4.9                  |
| PC057         | UGW         | 6              | 6.53 | 735                            | n.d.    | 1.53                  | 5.34             | n.d.               | 0.80           | 13.09           | 104.60           | 22.81            | 4.02            | 3.68                          | 496.24                        | 0.04               | 0.34 | 23.29 | n.d.                                      | 20.7 | 2               | -42.4              | -6.6                  |
| JH01          | UGW         | 6              | 6.74 | 1513                           | n.d.    | 0.10                  | 0.00             | n.d.               | n.d.           | n.d.            | n.d.             | n.d.             | 104.11          | 141.95                        | 592.02                        | 21.65              | 0.38 | 2.46  | n.d.                                      | 4.50 | 0               | n.d.               | n.d.                  |
| JH02          | UGW         | 7              | 6.70 | 1128                           | 27.3    | 0.85                  | 0.66             | n.d.               | 0.74           | 15.31           | 212.77           | 41.72            | 39.27           | 101.60                        | 768.67                        | 0.25               | 6.68 | 7.72  | n.d.                                      | 4.04 | 18              | n.d.               | n.d.                  |

|       |     |     |      |      |        |       |       |       |      |       |        |       |       |       |        |      |      |       |       |        |    |       |      |
|-------|-----|-----|------|------|--------|-------|-------|-------|------|-------|--------|-------|-------|-------|--------|------|------|-------|-------|--------|----|-------|------|
| JH03  | UGW | 11  | 6.76 | 614  | -104.9 | 0.21  | 0.06  | 0.000 | 0.53 | 16.30 | 75.30  | 34.60 | 4.41  | 1.19  | 438.18 | 0.24 | 6.32 | 26.05 | 2.90  | 0.0    | 0  | -44.1 | -6.8 |
| JH04  | UGW | 8.5 | 6.27 | 1351 | -122.8 | 0.50  | 5.25  | 0.000 | 0.37 | 48.50 | 177.00 | 56.40 | 95.34 | 67.61 | 642.26 | 0.15 | 5.82 | 15.23 | 0.47  | 9.0    | 0  | -39.6 | -6.3 |
| 15G01 | LGW | 30  | 6.44 | 745  | -203.1 | 8.70  | 8.10  | 0.000 | 2.42 | 15.45 | 117.90 | 21.47 | 1.97  | 0.00  | 559.34 | 0.04 | 0.16 | 5.08  | 10.07 | 60.4   | 6  | -45.7 | -6.9 |
| 15G04 | LGW | 30  | 6.26 | 1002 | -132.7 | 3.65  | 19.40 | 0.000 | 2.13 | 9.38  | 151.30 | 23.21 | 17.53 | 4.73  | 606.75 | 0.04 | 0.92 | 3.59  | 4.60  | 141.5  | 11 | -37.8 | -5.9 |
| 15G08 | LGW | 30  | 6.44 | 1022 | -85.3  | 14.10 | 17.10 | 0.007 | 3.03 | 16.89 | 126.50 | 26.15 | 1.88  | 0.00  | 658.65 | 0.00 | 0.97 | 8.59  | 16.19 | 24.9   | 5  | -37.1 | -5.7 |
| 15G09 | LGW | 30  | 6.41 | 712  | -89.9  | 8.95  | 10.95 | 0.000 | 2.18 | 15.27 | 111.10 | 21.88 | 1.07  | 0.00  | 538.20 | 0.11 | 0.45 | 5.11  | 13.14 | 25.8   | 4  | -47.0 | -7.1 |
| 15G10 | LGW | 30  | 6.65 | 714  | -52.1  | 2.60  | 6.05  | 0.002 | 1.70 | 29.87 | 88.52  | 21.90 | 0.41  | 0.00  | 457.47 | 0.00 | 0.26 | 12.15 | 4.01  | 20.0   | 2  | -41.6 | -6.2 |
| 15G11 | LGW | 25  | 6.43 | 722  | -71.7  | 0.98  | 3.00  | 0.002 | 1.45 | 23.23 | 113.50 | 26.45 | 0.52  | 0.00  | 566.39 | 0.05 | 0.09 | 3.15  | 2.36  | 3.9    | 9  | -50.4 | -7.6 |
| 15G12 | LGW | 30  | 6.48 | 955  | -87.6  | 2.35  | 14.60 | 0.008 | 1.25 | 12.76 | 129.60 | 30.64 | 5.74  | 0.00  | 616.36 | 0.05 | 0.42 | 3.42  | 3.38  | 20.4   | 3  | -42.5 | -6.6 |
| 15G13 | LGW | 18  | 6.41 | 725  | -70.1  | 1.50  | 13.65 | 0.005 | 1.18 | 12.51 | 127.10 | 34.09 | 5.77  | 0.00  | 639.11 | 0.05 | 0.31 | 3.23  | 2.75  | 25.3   | 0  | n.d.  | n.d. |
| 15G14 | LGW | 20  | 6.37 | 1118 | -56.7  | 2.95  | 7.15  | 0.005 | 1.40 | 30.84 | 156.60 | 31.28 | 1.08  | 0.00  | 789.35 | 0.00 | 0.23 | 3.69  | 4.99  | 16.7   | 4  | -48.6 | -7.2 |
| 15G15 | LGW | 20  | 6.51 | 1047 | -80.8  | 0.55  | 4.65  | 0.013 | 0.53 | 36.25 | 170.20 | 27.04 | 0.61  | 0.00  | 795.12 | 0.00 | 4.77 | 1.95  | 1.28  | 33.1   | 3  | n.d.  | n.d. |
| 15G16 | LGW | 30  | 6.56 | 885  | -100.4 | 6.55  | 11.45 | 0.000 | 4.15 | 9.18  | 137.50 | 25.87 | 2.90  | 0.00  | 630.78 | 0.10 | 0.32 | 2.79  | 8.65  | 49.3   | 4  | n.d.  | n.d. |
| 15G17 | LGW | 20  | 6.59 | 832  | -65.7  | 3.65  | 5.15  | 0.000 | 1.35 | 21.54 | 154.80 | 29.34 | 1.05  | 0.00  | 706.38 | 0.04 | 0.46 | 14.41 | 5.55  | 38.7   | 4  | -45.9 | -6.9 |
| 15G18 | LGW | 28  | 6.40 | 1158 | -104.2 | 2.35  | 8.35  | 0.000 | 1.15 | 33.20 | 186.10 | 28.99 | 1.13  | 0.00  | 874.57 | 0.00 | 1.73 | 14.41 | 4.10  | 220.3  | 1  | -52.2 | -7.8 |
| 15G19 | LGW | 25  | 6.83 | 885  | -134.9 | 3.00  | 5.50  | 0.010 | 1.50 | 18.84 | 134.00 | 20.31 | 1.81  | 0.00  | 584.65 | 0.00 | 0.23 | 3.85  | 3.79  | 93.0   | 30 | -50.9 | -7.9 |
| 15G21 | LGW | 25  | 6.99 | 739  | -138.8 | 2.45  | 5.25  | 0.002 | 1.41 | 20.91 | 136.30 | 20.43 | 1.54  | 0.00  | 608.67 | 0.05 | 8.22 | 2.43  | 5.11  | 1025.0 | 17 | -46.9 | -7.4 |
| 15G25 | LGW | 15  | 6.69 | 782  | -112.4 | 3.75  | 11.95 | 0.000 | 1.41 | 16.47 | 118.70 | 21.32 | 3.61  | 0.00  | 510.97 | 0.00 | 0.31 | 2.76  | n.d.  | 27.6   | 16 | -46.8 | -7.2 |

|       |     |    |      |      |        |       |       |       |       |       |        |       |       |       |        |      |      |       |        |       |      |       |      |
|-------|-----|----|------|------|--------|-------|-------|-------|-------|-------|--------|-------|-------|-------|--------|------|------|-------|--------|-------|------|-------|------|
| 15G39 | LGW | 15 | 6.93 | 1006 | -119.8 | 1.75  | 7.50  | 0.000 | 1.07  | 20.90 | 158.00 | 25.52 | 1.43  | 0.00  | 730.26 | 0.00 | 0.50 | 6.50  | 3.54   | 8.9   | 14   | -49.1 | -7.5 |
| 15G40 | LGW | 15 | 6.05 | 296  | -41.2  | 6.50  | 15.75 | 0.000 | n.d.  | n.d.  | n.d.   | n.d.  | 2.67  | 0.00  | 165.82 | 0.03 | 0.25 | 16.90 | 415.93 | 0.0   | n.d. | -63.8 | -9.6 |
| 15G41 | LGW | 30 | 7.14 | 928  | -126.5 | 1.30  | 3.55  | 0.000 | 0.84  | 27.90 | 141.10 | 25.73 | 0.99  | 0.00  | 680.83 | 0.03 | 1.14 | 3.13  | 26.48  | 235.1 | 29   | -48.2 | -7.4 |
| SH01A | LGW | 25 | 7.23 | 1104 | -164.4 | 4.20  | 11.8  | 0.000 | 2.24  | 33.28 | 145.60 | 25.78 | 1.82  | 0.00  | 728.81 | 0.00 | 2.33 | 2.86  | 3.57   | 355.2 | 5    | -46.5 | -7.1 |
| SH02A | LGW | 25 | 8.40 | 1697 | -267.6 | 2.10  | 0.26  | 0.010 | n.d.  | n.d.  | n.d.   | n.d.  | n.d.  | n.d.  | n.d.   | n.d. | 0.13 | 8.89  | 2.65   | 2.7   | 100  | n.d.  | n.d. |
| SH03A | LGW | 25 | 7.18 | 1073 | -160.1 | 1.58  | 7.75  | 0.000 | 1.26  | 33.61 | 146.00 | 25.79 | 4.44  | 4.25  | 730.41 | 0.00 | 3.43 | 2.44  | 1.71   | 762.3 | 16   | -45.9 | -7.3 |
| 15S01 | TSR | 0  | 6.68 | 350  | 34.7   | 0.07  | 0.10  | 0.000 | 2.43  | 7.65  | 50.13  | 9.05  | 8.30  | 35.64 | 143.52 | 1.15 | 0.01 | 2.24  | 8.53   | 1.5   | 18.5 | -52.5 | -7.8 |
| 15S04 | TSR | 0  | 6.79 | 667  | 1.5    | 3.20  | 0.05  | 0.181 | 11.31 | 33.28 | 98.18  | 18.04 | 45.50 | 65.12 | 348.55 | 0.58 | 0.52 | 22.08 | 8.94   | 6.6   | 15   | -29.7 | -5.0 |
| 15S05 | TSR | 0  | 6.62 | 732  | 2.6    | 10.25 | 0.07  | 0.020 | 7.08  | 43.58 | 77.13  | 14.42 | 38.60 | 0.00  | 261.41 | 0.00 | 0.59 | 11.40 | 17.50  | 10.3  | 27   | -41.7 | -6.6 |
| 15S06 | TSR | 0  | 6.69 | 654  | 25.0   | 7.05  | 0.23  | 0.131 | 6.87  | 27.56 | 79.73  | 14.33 | 32.92 | 63.20 | 259.49 | 0.00 | 0.62 | 8.41  | 13.41  | 6.4   | 45   | -38.2 | -6.0 |
| 15S07 | TSR | 0  | 6.65 | 467  | -27.1  | 4.28  | 0.09  | 0.046 | 7.40  | 17.65 | 80.14  | 13.60 | 34.47 | 35.79 | 283.83 | 0.83 | 0.48 | 4.11  | 12.44  | 9.7   | 29   | -44.5 | -6.7 |
| 15S08 | TSR | 0  | 6.56 | 632  | 69.1   | 3.75  | 0.17  | 0.127 | 7.35  | 24.38 | 83.61  | 14.96 | 34.62 | 50.23 | 275.51 | 0.00 | 0.50 | 6.55  | 7.88   | 8.6   | 23   | -34.6 | -5.1 |
| 15S09 | TSR | 0  | 6.78 | 442  | -17.3  | 3.53  | 0.04  | 0.061 | 7.77  | 17.35 | 70.98  | 12.14 | 34.64 | 24.94 | 233.22 | 0.25 | 0.30 | 7.24  | 6.98   | 9.0   | 15   | -17.5 | -3.4 |
| 15S10 | TSR | 0  | 6.66 | 467  | 44.3   | 3.23  | 0.08  | 0.061 | 8.08  | 15.48 | 72.49  | 12.56 | 37.38 | 27.37 | 231.30 | 0.42 | 0.32 | 6.72  | 7.16   | 8.7   | 14   | -18.1 | -3.2 |
| 15S11 | TSR | 0  | 6.71 | 509  | 25.1   | 3.18  | 0.03  | 0.064 | 7.49  | 14.49 | 67.16  | 11.66 | 33.49 | 22.15 | 214.64 | 0.42 | 0.32 | 6.04  | 6.78   | 10.4  | 10   | -15.7 | -3.1 |
| 15S12 | TSR | 0  | 6.68 | 382  | 109.9  | 0.38  | n.d.  | 0.000 | 7.51  | 14.68 | 73.48  | 11.02 | 45.94 | 22.13 | 200.22 | 0.92 | 0.03 | 17.25 | 6.41   | 9.0   | 41   | -19.0 | -3.7 |
| 15S03 | HR  | 0  | 6.87 | 240  | 104.7  | 0.15  | 0.04  | 0.000 | 2.32  | 7.50  | 43.18  | 9.02  | 7.81  | 34.78 | 140.96 | 1.09 | 0.00 | 2.66  | n.d.   | 3.0   | n.d. | -52.4 | -8.3 |

n.d. means no data
